# Supplementary material
Source: PubMed Central journal article supplement (PMC1838500)

Ant number

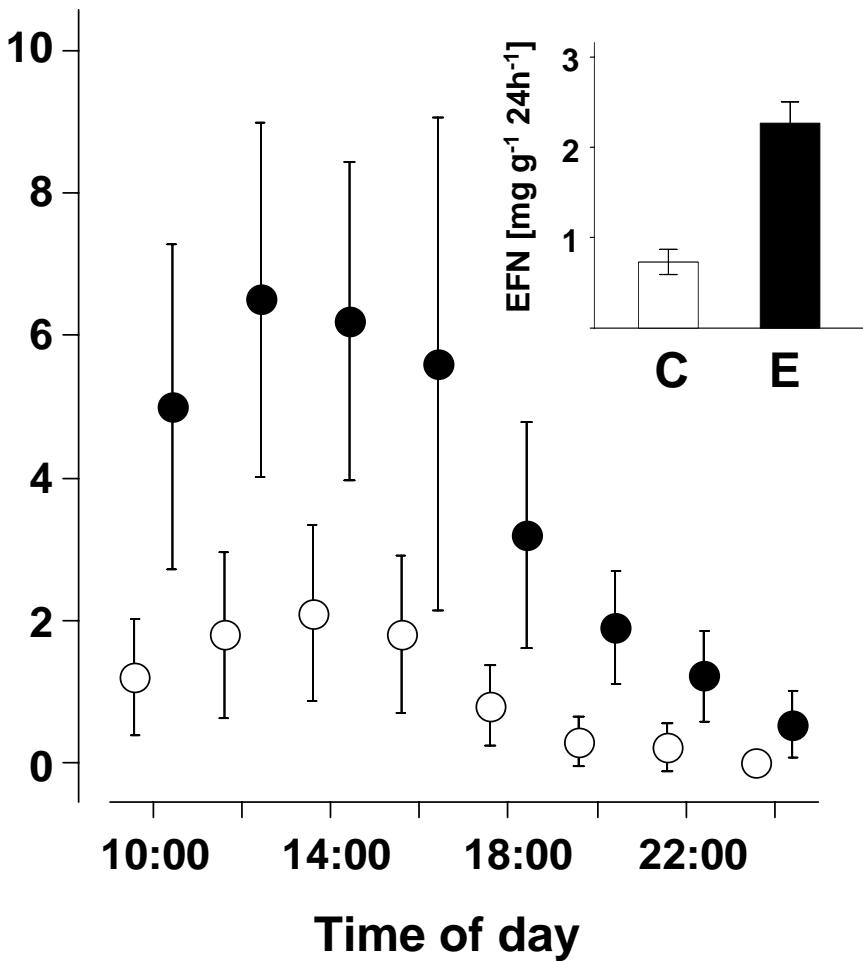

Supplement: pnas_0610266104_1.pdf [file pnas_0610266104_1.pdf]

**Volatile amount [% IS]**

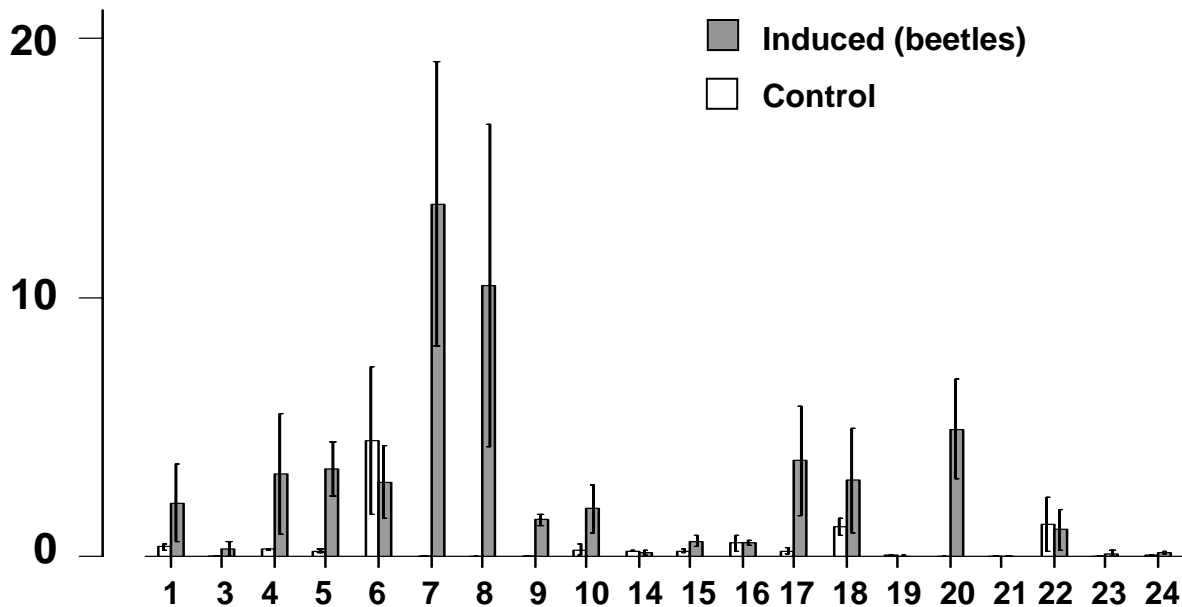

**Compound No.**

Supplement: pnas_0610266104_2.pdf [file pnas_0610266104_2.pdf]

Volatile amount [% IS]

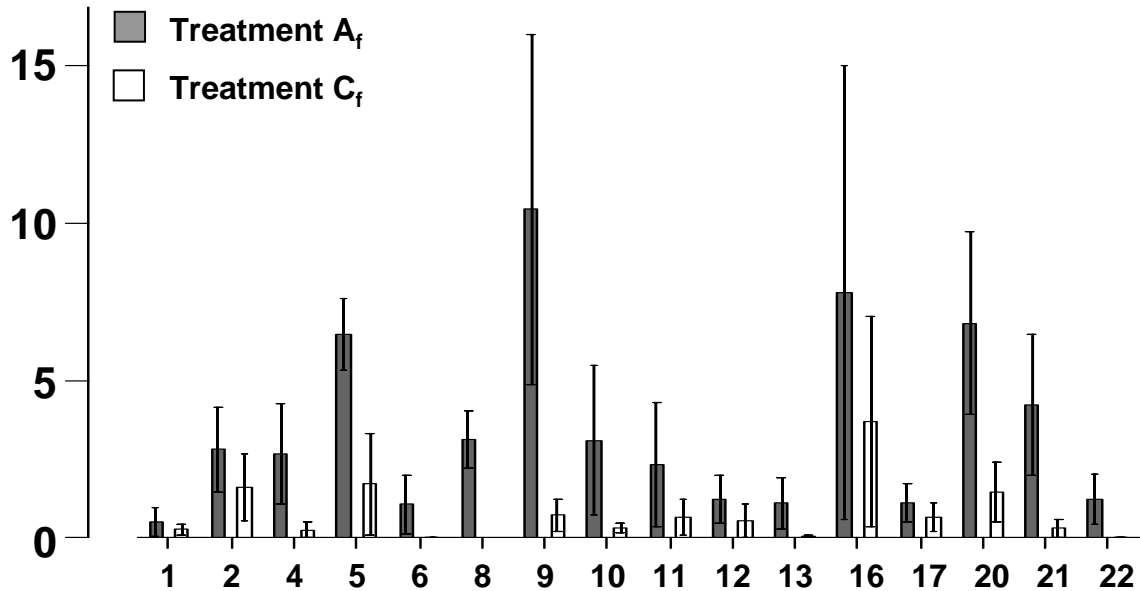

Compound No.

Supplement: pnas_0610266104_3.pdf [file pnas_0610266104_3.pdf]

# Treatment

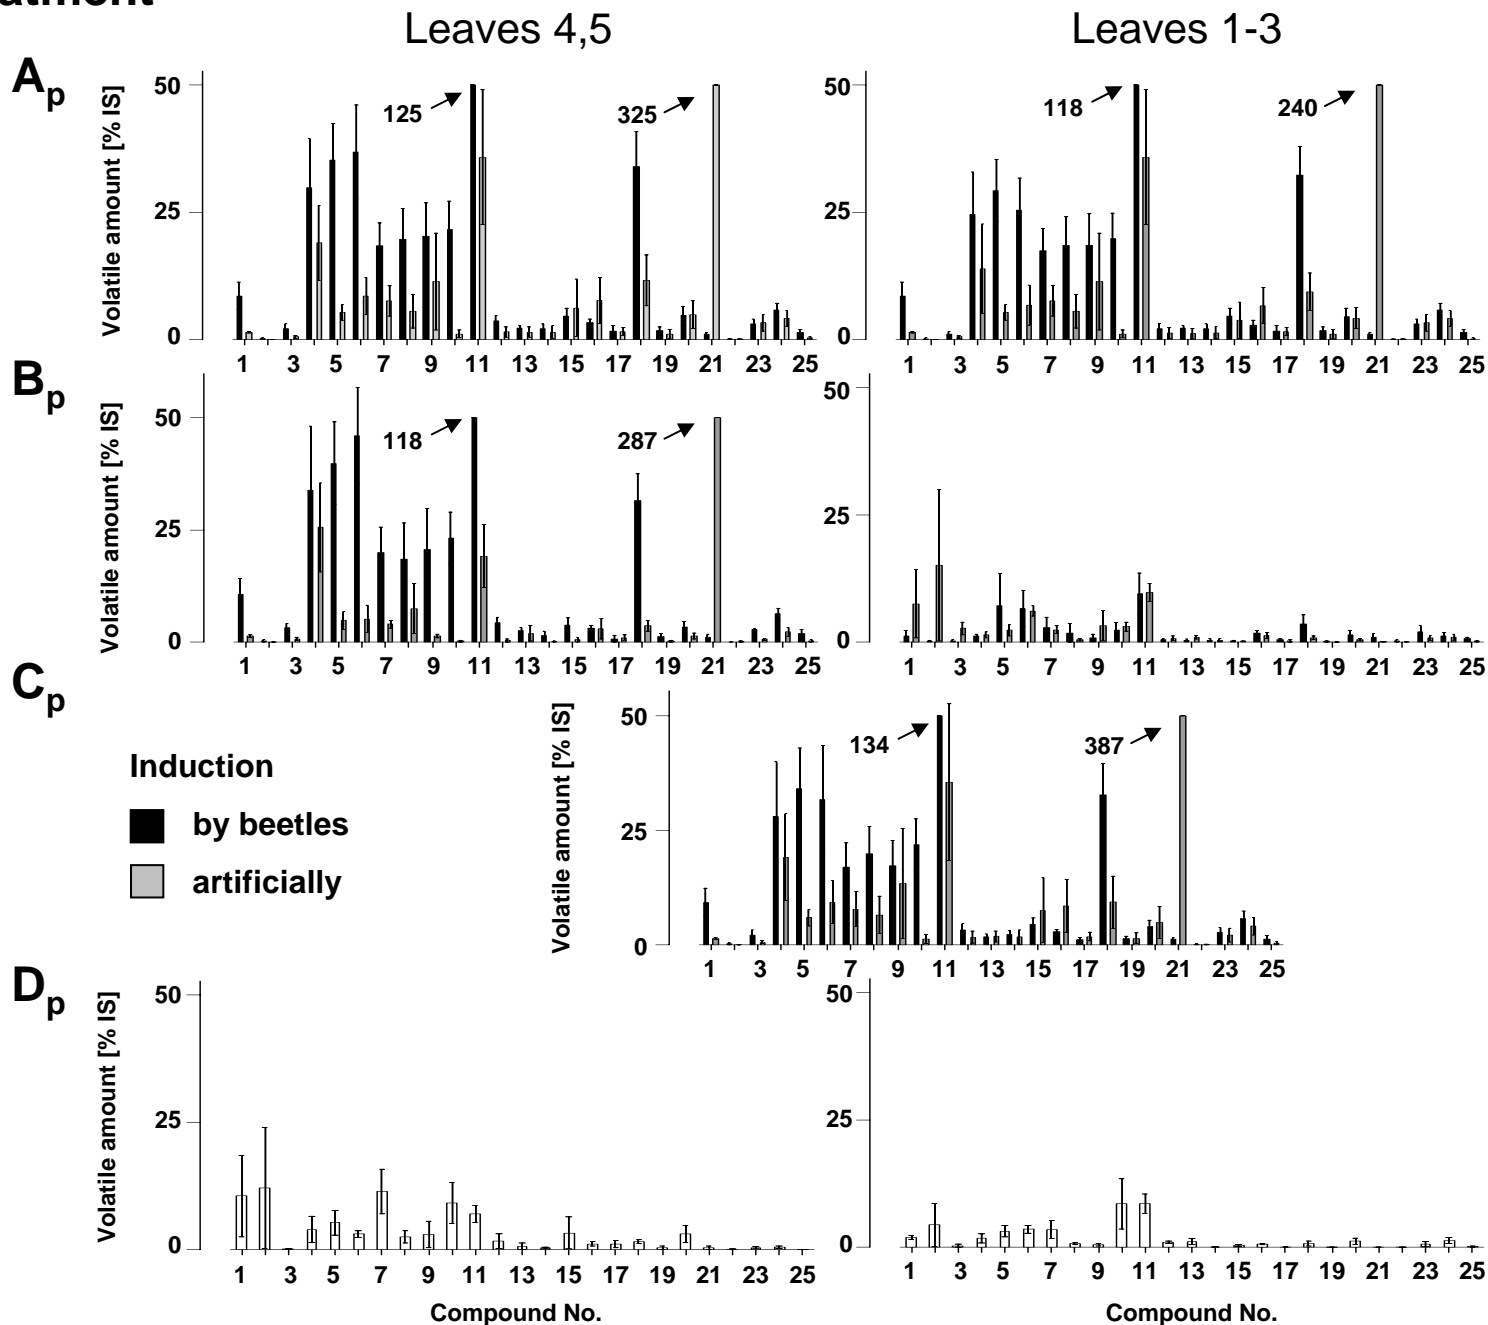

Supplement: pnas_0610266104_4.pdf [file pnas_0610266104_4.pdf]
